# Supplementary material
Source: MDPI journal article supplement (https://www.mdpi.com/2413-8851/6/2/27)
Supplement: s1 [file s1]

## **Supplementary Material**

### **Assessment of Air Pollution Mitigation Measures on Secondary Pollutants PM<sub>10</sub> and ozone using Chemical Transport Modelling over Megacity Delhi, India**

**Medhavi Gupta, Manju Mohan\* and Shweta Bhati**

Centre for Atmospheric Sciences  
Indian Institute of Technology Delhi  
Hauz Khas, New Delhi-110016, India

\*Corresponding Author: Manju Mohan

Email: [mmohan66@gmail.com](mailto:mmohan66@gmail.com)

Phone: +91-11-2659 1313

**Table S1: Original NO<sub>x</sub> EDGAR emissions and modified NO<sub>x</sub> emissions based on energy sector control scenario over Delhi.**

| <b>Original Edgar NO<sub>x</sub> Emissions (kg/m<sup>2</sup>/s)</b> |             |             |           |             |             |             |
|---------------------------------------------------------------------|-------------|-------------|-----------|-------------|-------------|-------------|
| <b>Lon (°)<br/>Lat (°)</b>                                          | <b>76.8</b> | <b>76.9</b> | <b>77</b> | <b>77.1</b> | <b>77.2</b> | <b>77.3</b> |
| <b>28.4</b>                                                         | 4.13E-12    | 4.13E-12    | 1.21E-09  | 1.21E-09    | 1.21E-09    | 2.17E-09    |
| <b>28.5</b>                                                         | 4.14E-12    | 4.14E-12    | 1.22E-09  | 1.22E-09    | 1.22E-09    | 2.17E-09    |
| <b>28.6</b>                                                         | 0           | 0           | 0         | 0           | 0           | 0           |
| <b>28.7</b>                                                         | 0           | 0           | 0         | 0           | 0           | 0           |
| <b>28.8</b>                                                         | 0           | 0           | 0         | 0           | 0           | 0           |
| <b>Modified Edgar NO<sub>x</sub> Emissions (kg/m<sup>2</sup>/s)</b> |             |             |           |             |             |             |

| Lon (°)<br>Lat (°) | 76.8     | 76.9     | 77       | 77.1     | 77.2     | 77.3     |
|--------------------|----------|----------|----------|----------|----------|----------|
| 28.4               | 2.62E-12 | 2.62E-12 | 7.69E-10 | 7.69E-10 | 7.69E-10 | 1.37E-09 |
| 28.5               | 2.62E-12 | 2.62E-12 | 7.70E-10 | 7.70E-10 | 7.70E-10 | 1.38E-09 |
| 28.6               | 0        | 0        | 0        | 0        | 0        | 0        |
| 28.7               | 0        | 0        | 0        | 0        | 0        | 0        |
| 28.8               | 0        | 0        | 0        | 0        | 0        | 0        |

**Table S2: Original PM<sub>10</sub> EDGAR emissions and modified PM<sub>10</sub> emissions based on energy sector control scenario over Delhi.**

| Original Edgar PM <sub>10</sub> Emissions (kg/m <sup>2</sup> /s) |          |          |          |          |          |          |
|------------------------------------------------------------------|----------|----------|----------|----------|----------|----------|
| Lon (°)<br>Lat (°)                                               | 76.8     | 76.9     | 77       | 77.1     | 77.2     | 77.3     |
| 28.4                                                             | 3.51E-12 | 3.51E-12 | 1.03E-09 | 1.03E-09 | 1.03E-09 | 1.85E-09 |
| 28.5                                                             | 3.52E-12 | 3.52E-12 | 1.03E-09 | 1.03E-09 | 1.03E-09 | 1.85E-09 |
| 28.6                                                             | 4.92E-15 | 4.92E-15 | 2.74E-15 | 2.74E-15 | 2.74E-15 | 4.95E-15 |
| 28.7                                                             | 4.92E-15 | 4.92E-15 | 2.75E-15 | 2.75E-15 | 2.75E-15 | 4.96E-15 |
| 28.8                                                             | 8.57E-16 | 8.57E-16 | 8.21E-16 | 8.21E-16 | 8.21E-16 | 2.82E-15 |
| Modified Edgar PM <sub>10</sub> Emissions (kg/m <sup>2</sup> /s) |          |          |          |          |          |          |
| Lon (°)                                                          | 76.8     | 76.9     | 77       | 77.1     | 77.2     | 77.3     |

| Lat (°)     |          |          |          |          |          |          |
|-------------|----------|----------|----------|----------|----------|----------|
| <b>28.4</b> | 3.51E-12 | 3.51E-12 | 1.03E-09 | 1.03E-09 | 1.03E-09 | 1.85E-09 |
| <b>28.5</b> | 3.52E-12 | 3.52E-12 | 1.03E-09 | 1.03E-09 | 1.03E-09 | 1.85E-09 |
| <b>28.6</b> | 4.91E-15 | 4.91E-15 | 2.74E-15 | 2.74E-15 | 2.74E-15 | 4.95E-15 |
| <b>28.7</b> | 4.92E-15 | 4.92E-15 | 2.74E-15 | 2.74E-15 | 2.74E-15 | 4.95E-15 |
| <b>28.8</b> | 8.56E-16 | 8.56E-16 | 8.20E-16 | 8.20E-16 | 8.20E-16 | 2.82E-15 |

**Table S3: Original NO<sub>x</sub> EDGAR emissions and modified NO<sub>x</sub> emissions based on residential sector control scenario over Delhi.**

| <b>Original Edgar NO<sub>x</sub> Emissions (kg/m<sup>2</sup>/s)</b> |             |             |           |             |             |             |
|---------------------------------------------------------------------|-------------|-------------|-----------|-------------|-------------|-------------|
| <b>Lon (°)<br/>Lat (°)</b>                                          | <b>76.8</b> | <b>76.9</b> | <b>77</b> | <b>77.1</b> | <b>77.2</b> | <b>77.3</b> |
| <b>28.4</b>                                                         | 2.41E-11    | 2.41E-11    | 2.04E-11  | 2.04E-11    | 2.04E-11    | 3.68E-11    |
| <b>28.5</b>                                                         | 2.41E-11    | 2.41E-11    | 2.04E-11  | 2.04E-11    | 2.04E-11    | 3.68E-11    |
| <b>28.6</b>                                                         | 1.17E-11    | 1.17E-11    | 1.97E-11  | 1.97E-11    | 1.97E-11    | 3.64E-11    |
| <b>28.7</b>                                                         | 1.18E-11    | 1.18E-11    | 1.97E-11  | 1.97E-11    | 1.97E-11    | 3.65E-11    |
| <b>28.8</b>                                                         | 2.10E-11    | 2.10E-11    | 2.71E-11  | 2.71E-11    | 2.71E-11    | 3.42E-11    |
| <b>Modified Edgar NO<sub>x</sub> Emissions (kg/m<sup>2</sup>/s)</b> |             |             |           |             |             |             |
| <b>Lon (°)<br/>Lat (°)</b>                                          | <b>76.8</b> | <b>76.9</b> | <b>77</b> | <b>77.1</b> | <b>77.2</b> | <b>77.3</b> |
| <b>28.4</b>                                                         | 7.36E-12    | 7.36E-12    | 6.23E-12  | 6.23E-12    | 6.23E-12    | 1.12E-11    |
| <b>28.5</b>                                                         | 7.36E-12    | 7.36E-12    | 6.24E-12  | 6.24E-12    | 6.24E-12    | 1.12E-11    |
| <b>28.6</b>                                                         | 3.59E-12    | 3.59E-12    | 6.00E-12  | 6.00E-12    | 6.00E-12    | 1.11E-11    |
| <b>28.7</b>                                                         | 3.59E-12    | 3.59E-12    | 6.01E-12  | 6.01E-12    | 6.01E-12    | 1.11E-11    |
| <b>28.8</b>                                                         | 6.41E-12    | 6.41E-12    | 8.28E-12  | 8.28E-12    | 8.28E-12    | 1.05E-11    |

**Table S4: Original PM<sub>10</sub> EDGAR emissions and modified PM<sub>10</sub> emissions based on residential sector control scenario over Delhi.**

| <b>Original Edgar PM<sub>10</sub> Emissions (kg/m<sup>2</sup>/s)</b> |             |             |           |             |             |             |
|----------------------------------------------------------------------|-------------|-------------|-----------|-------------|-------------|-------------|
| <b>Lon (°)<br/>Lat (°)</b>                                           | <b>76.8</b> | <b>76.9</b> | <b>77</b> | <b>77.1</b> | <b>77.2</b> | <b>77.3</b> |
| <b>28.4</b>                                                          | 2.95E-11    | 2.95E-11    | 9.12E-11  | 9.12E-11    | 9.12E-11    | 9.43E-11    |
| <b>28.5</b>                                                          | 2.95E-11    | 2.95E-11    | 9.13E-11  | 9.13E-11    | 9.13E-11    | 9.44E-11    |
| <b>28.6</b>                                                          | 4.48E-11    | 4.48E-11    | 4.48E-11  | 4.48E-11    | 4.48E-11    | 9.36E-11    |
| <b>28.7</b>                                                          | 4.48E-11    | 4.48E-11    | 4.49E-11  | 4.49E-11    | 4.49E-11    | 9.37E-11    |
| <b>28.8</b>                                                          | 5.32E-11    | 5.32E-11    | 6.85E-11  | 6.85E-11    | 6.85E-11    | 8.69E-11    |
| <b>Modified Edgar PM<sub>10</sub> Emissions (kg/m<sup>2</sup>/s)</b> |             |             |           |             |             |             |
| <b>Lon (°)<br/>Lat (°)</b>                                           | <b>76.8</b> | <b>76.9</b> | <b>77</b> | <b>77.1</b> | <b>77.2</b> | <b>77.3</b> |
| <b>28.4</b>                                                          | 9.32E-12    | 9.32E-12    | 2.88E-11  | 2.88E-11    | 2.88E-11    | 2.98E-11    |
| <b>28.5</b>                                                          | 9.33E-12    | 9.33E-12    | 2.88E-11  | 2.88E-11    | 2.88E-11    | 2.98E-11    |
| <b>28.6</b>                                                          | 1.41E-11    | 1.41E-11    | 1.42E-11  | 1.42E-11    | 1.42E-11    | 2.96E-11    |
| <b>28.7</b>                                                          | 1.42E-11    | 1.42E-11    | 1.42E-11  | 1.42E-11    | 1.42E-11    | 2.96E-11    |
| <b>28.8</b>                                                          | 1.68E-11    | 1.68E-11    | 2.16E-11  | 2.16E-11    | 2.16E-11    | 2.74E-11    |

**Table S5: Original NO<sub>x</sub> EDGAR emissions and modified NO<sub>x</sub> emissions based on transport sector control scenario over Delhi.**

| <b>Original Edgar NO<sub>x</sub> Emissions (kg/m<sup>2</sup>/s)</b> |             |             |           |             |             |             |
|---------------------------------------------------------------------|-------------|-------------|-----------|-------------|-------------|-------------|
| <b>Lon (°)<br/>Lat (°)</b>                                          | <b>76.8</b> | <b>76.9</b> | <b>77</b> | <b>77.1</b> | <b>77.2</b> | <b>77.3</b> |
| <b>28.4</b>                                                         | 2.81E-09    | 2.81E-09    | 2.78E-09  | 2.78E-09    | 2.78E-09    | 3.58E-11    |
| <b>28.5</b>                                                         | 2.82E-09    | 2.82E-09    | 2.78E-09  | 2.78E-09    | 2.78E-09    | 3.59E-11    |
| <b>28.6</b>                                                         | 2.70E-09    | 2.70E-09    | 2.69E-09  | 2.69E-09    | 2.69E-09    | 3.59E-11    |
| <b>28.7</b>                                                         | 2.70E-09    | 2.70E-09    | 2.69E-09  | 2.69E-09    | 2.69E-09    | 3.60E-11    |
| <b>28.8</b>                                                         | 6.42E-11    | 6.42E-11    | 6.46E-11  | 6.46E-11    | 6.46E-11    | 3.68E-11    |
| <b>Modified Edgar NO<sub>x</sub> Emissions (kg/m<sup>2</sup>/s)</b> |             |             |           |             |             |             |
| <b>Lon (°)<br/>Lat (°)</b>                                          | <b>76.8</b> | <b>76.9</b> | <b>77</b> | <b>77.1</b> | <b>77.2</b> | <b>77.3</b> |
| <b>28.4</b>                                                         | 2.15E-09    | 2.15E-09    | 2.12E-09  | 2.12E-09    | 2.12E-09    | 2.74E-11    |
| <b>28.5</b>                                                         | 2.15E-09    | 2.15E-09    | 2.12E-09  | 2.12E-09    | 2.12E-09    | 2.74E-11    |
| <b>28.6</b>                                                         | 2.06E-09    | 2.06E-09    | 2.05E-09  | 2.05E-09    | 2.05E-09    | 2.75E-11    |
| <b>28.7</b>                                                         | 2.06E-09    | 2.06E-09    | 2.05E-09  | 2.05E-09    | 2.05E-09    | 2.75E-11    |
| <b>28.8</b>                                                         | 4.91E-11    | 4.91E-11    | 4.93E-11  | 4.93E-11    | 4.93E-11    | 2.81E-11    |

**Table S6: Original PM<sub>10</sub> EDGAR emissions and modified PM<sub>10</sub> emissions based on transport sector control scenario over Delhi.**

| <b>Original Edgar PM<sub>10</sub> Emissions (kg/m<sup>2</sup>/s)</b> |             |             |           |             |             |             |
|----------------------------------------------------------------------|-------------|-------------|-----------|-------------|-------------|-------------|
| <b>Lon (°)<br/>Lat (°)</b>                                           | <b>76.8</b> | <b>76.9</b> | <b>77</b> | <b>77.1</b> | <b>77.2</b> | <b>77.3</b> |
| <b>28.4</b>                                                          | 5.02E-10    | 5.02E-10    | 5.00E-10  | 5.00E-10    | 5.00E-10    | 9.31E-12    |
| <b>28.5</b>                                                          | 5.02E-10    | 5.02E-10    | 5.01E-10  | 5.01E-10    | 5.01E-10    | 9.32E-12    |
| <b>28.6</b>                                                          | 4.98E-10    | 4.98E-10    | 4.98E-10  | 4.98E-10    | 4.98E-10    | 9.33E-12    |
| <b>28.7</b>                                                          | 4.99E-10    | 4.99E-10    | 4.98E-10  | 4.98E-10    | 4.98E-10    | 9.34E-12    |
| <b>28.8</b>                                                          | 1.78E-11    | 1.78E-11    | 1.78E-11  | 1.78E-11    | 1.78E-11    | 9.76E-12    |
| <b>Modified Edgar PM<sub>10</sub> Emissions (kg/m<sup>2</sup>/s)</b> |             |             |           |             |             |             |
| <b>Lon (°)<br/>Lat (°)</b>                                           | <b>76.8</b> | <b>76.9</b> | <b>77</b> | <b>77.1</b> | <b>77.2</b> | <b>77.3</b> |
| <b>28.4</b>                                                          | 3.56E-10    | 3.56E-10    | 3.55E-10  | 3.55E-10    | 3.55E-10    | 6.60E-12    |
| <b>28.5</b>                                                          | 3.56E-10    | 3.56E-10    | 3.55E-10  | 3.55E-10    | 3.55E-10    | 6.60E-12    |
| <b>28.6</b>                                                          | 3.53E-10    | 3.53E-10    | 3.53E-10  | 3.53E-10    | 3.53E-10    | 6.61E-12    |
| <b>28.7</b>                                                          | 3.54E-10    | 3.54E-10    | 3.53E-10  | 3.53E-10    | 3.53E-10    | 6.62E-12    |
| <b>28.8</b>                                                          | 1.26E-11    | 1.26E-11    | 1.26E-11  | 1.26E-11    | 1.26E-11    | 6.92E-12    |
